# Supplementary material for: The Role of the Belief System for Anger Management of Couples with Anger and Aggression: A Cognitive-Behavioral Perspective
Source: Springer Nature journal article supplement (doi:10.1007/s10942-018-0307-5), 2018-10-30
Supplement: MOESM1 [file 16240366]

Table 1. pre-test raw scores, cut points

| Group | SL. No | Gender | Age | TA*  Pre  Raw score | AXO*  Pre-test  Raw score | AXI*  Pre-tes  Raw score | NAS*  Pre-test  Raw score | ADS:S*  Pre-test  Raw score | AQ*  Pre-test  Raw score | **Above cut points** |
| --- | --- | --- | --- | --- | --- | --- | --- | --- | --- | --- |
| Experimental  Group | 1 | Female | 30 | 27 | 28 | 20 | 108 | 69 | 99 | **Yes** |
| Male | 49 | 26 | 24 | 29 | 111 | 69 | 94 | **Yes** |
| 4 | Male | 24 | 39 | 30 | 29 | 107 | 56 | 126 | **Yes** |
| Female | 24 | 28 | 32 | 21 | 132 | 71 | 140 | **Yes** |
| 6 | Male | 34 | 32 | 22 | 28 | 105 | 44 | 71 | **Yes** |
| Female | 27 | 31 | 25 | 27 | 115 | 61 | 136 | **Yes** |
| 8 | Male | 40 | 23 | 18 | 14 | 89 | 43 | 71 | **No**** |
| Female | 36 | 28 | 23 | 12 | 108 | 45 | 86 | **Yes** |
| 14 | Female | 28 | 35 | 29 | 24 | 124 | 57 | 127 | **Yes** |
| Male | 30 | 35 | 23 | 20 | 107 | 65 | 104 | **Yes** |
| 16 | Female | 34 | 29 | 24 | 30 | 119 | 52 | 124 | **Yes** |
| Male | 34 | 21 | 20 | 15 | 95 | 41 | 77 | **Yes** |
| 26 | Male | 37 | 33 | 20 | 10 | 120 | 72 | 126 | **Yes** |
| Female | 33 | 34 | 27 | 8 | 131 | 67 | 146 | **Yes** |
| 20 | Female | 24 | 31 | 20 | 26 | 120 | 58 | 139 | **Yes** |
| Male | 33 | 19 | 18 | 14 | 110 | 55 | 89 | **Yes** |
| Control Group | 3 | Male | 39 | 28 | 22 | 14 | 128 | 77 | 131 | **Yes** |
| Female | 29 | 30 | 26 | 27 | 110 | 65 | 98 | **Yes** |
| 7 | Male | 36 | 31 | 24 | 17 | 130 | 77 | 153 | **Yes** |
| Female | 30 | 23 | 23 | 27 | 106 | 54 | 103 | **Yes** |
| 15 | Male | 33 | 25 | 20 | 15 | 106 | 45 | 99 | **Yes** |
| Female | 25 | 27 | 21 | 25 | 136 | 64 | 134 | **Yes** |
| 25 | Female | 25 | 28 | 25 | 22 | 119 | 57 | 122 | **Yes** |
| Male | 28 | 20 | 18 | 17 | 98 | 41 | 103 | **Yes** |
| 27 | Female | 37 | 17 | 12 | 18 | 64 | 39 | 52 | **No**** |
| Male | 33 | 23 | 23 | 20 | 89 | 40 | 94 | **Yes** |
| 21 | Male | 28 | 19 | 20 | 15 | 94 | 43 | 90 | **Yes** |
| Female | 32 | 25 | 18 | 23 | 100 | 47 | 106 | **Yes** |

*Cut points: Trait Anger (TA) = 25, Anger Expression Out (AXO) = 20, Anger Expression In (AXI) = 20, Novaco anger scale (NAS)= 96, Anger disorder scale (ADS:S) = 54, Aggression questionnaire (AQ) = 102

** Although the both participants had scored lower than cut points, however they reported frequent weekly episodes of physical and verbal aggression within past 6 months.

.

| Group | SL. No | Gender | Employment status | Education level | Marital  status | Age | No. of  Children |
| --- | --- | --- | --- | --- | --- | --- | --- |
| Experimental  Group | 1 | Female | Self-Employed | Degree Graduate | In a relationship | 30 | 0 |
| Male | Self-Employed | Post Graduate | 49 | 2 |
| 4 | Male | Self-Employed | High School Graduate | In a relationship | 24 | 0 |
| Female | Unemployed | High School Graduate | 24 |
| 6 | Male | Employed | Post Graduate | Married | 34 | 0 |
| Female | Employed | Post Graduate | 27 |
| 8 | Male | Self-Employed | High School Graduate | In a relationship | 40 | 0 |
| Female | Unemployed | Degree Graduate | 36 |
| 14 | Female | Employed | Degree Graduate | In a relationship | 28 | 0 |
| Male | Employed | Post Graduate | 30 |
| 16 | Female | Employed | Degree Graduate | In a relationship | 34 | 0 |
| Male | Employed | Degree Graduate | 34 |
| 26 | Male | Employed | High School Graduate | Married | 37 | 2 |
| Female | Housewife | High School Graduate | 33 |
| 20 | Female | Housewife | Degree Graduate | Married | 24 | 0 |
| Male | Employed | Degree Graduate | 33 |
| Control Group | 3 | Male | Employed | Degree Graduate | Married | 39 | 1 |
| Female | Student | High School Graduate | 29 |
| 7 | Male | Self-Employed | High School Graduate | Married | 36 | 1 |
| Female | Housewife | Degree Graduate | 30 |
| 15 | Male | Employed | Post Graduate | Married | 33 | 0 |
| Female | Housewife | Degree Graduate | 25 |
| 25 | Female | Employed | Degree Graduate | In a relationship | 25 | 0 |
| Male | Employed | Degree Graduate | 28 |
| 27 | Female | Employed | Degree Graduate | In a relationship | 37 | 0 |
| Male | Employed | Degree Graduate | 33 |
| 21 | Male | Employed | Degree Graduate | In a relationship | 28 | 0 |
| Female | Employed | Post Graduate | 32 |

Table 2. Sociodemographic info

Table 3. Tests of Between-Subjects Effects

| Measure | Subscale | F | Sig. | η 2 | Cohen’s d |
| --- | --- | --- | --- | --- | --- |
| Novaco anger scale | Cognitive | 4.774 | .038 | .155 | 0.856 |
| Arousal | 2.255 | .145 | .080 | 0.589 |
| Behavior | 3.157 | .087 | .108 | 0.695 |
| Anger Regulation | .887 | .355 | .033 | 0.369 |
| NAS total | 4.200 | .051 | .139 | 0.803 |
| Anger disorder scale:short | Reactivity/Expression | 1.101 | .304 | .041 | 0.413 |
| Anger-In | 1.254 | .273 | .046 | 0.439 |
| Vengeance | 1.108 | .302 | .041 | 0.413 |
| ADS total | 1.645 | .211 | .059 | 0.500 |
| Aggression questionnaire | Physical aggression | .250 | .621 | .010 | 0.201 |
| Verbal aggression | 1.347 | .256 | .049 | 0.454 |
| Anger | 1.262 | .272 | .046 | 0.439 |
| Hostility | 2.973 | .097 | .103 | 0.677 |
| Indirect aggression | 3.865 | .060 | .129 | 0.769 |
| AQ total | 2.211 | .149 | .078 | 0.581 |
| STAXI-2 | Angry temperament | 1.051 | .315 | .039 | 0.402 |
| Angry reaction | .233 | .633 | .009 | 0.190 |
| Trait anger | .144 | .707 | .006 | 0.155 |
| Anger expression out | .588 | .450 | .022 | 0.300 |
| Anger expression In | 1.247 | .274 | .046 | 0.439 |
| Anger control out | .220 | .643 | .008 | 0.179 |
| Anger control In | 2.661 | .115 | .093 | 0.640 |
| Anger expression index | 2.891 | .101 | .100 | 0.666 |
